# Supplementary material
Source: PubMed Central journal article supplement (PMC9786282)
Supplement: MICC-29-e12768-s001.pdf [file MICC-29-e12768-s001.pdf]

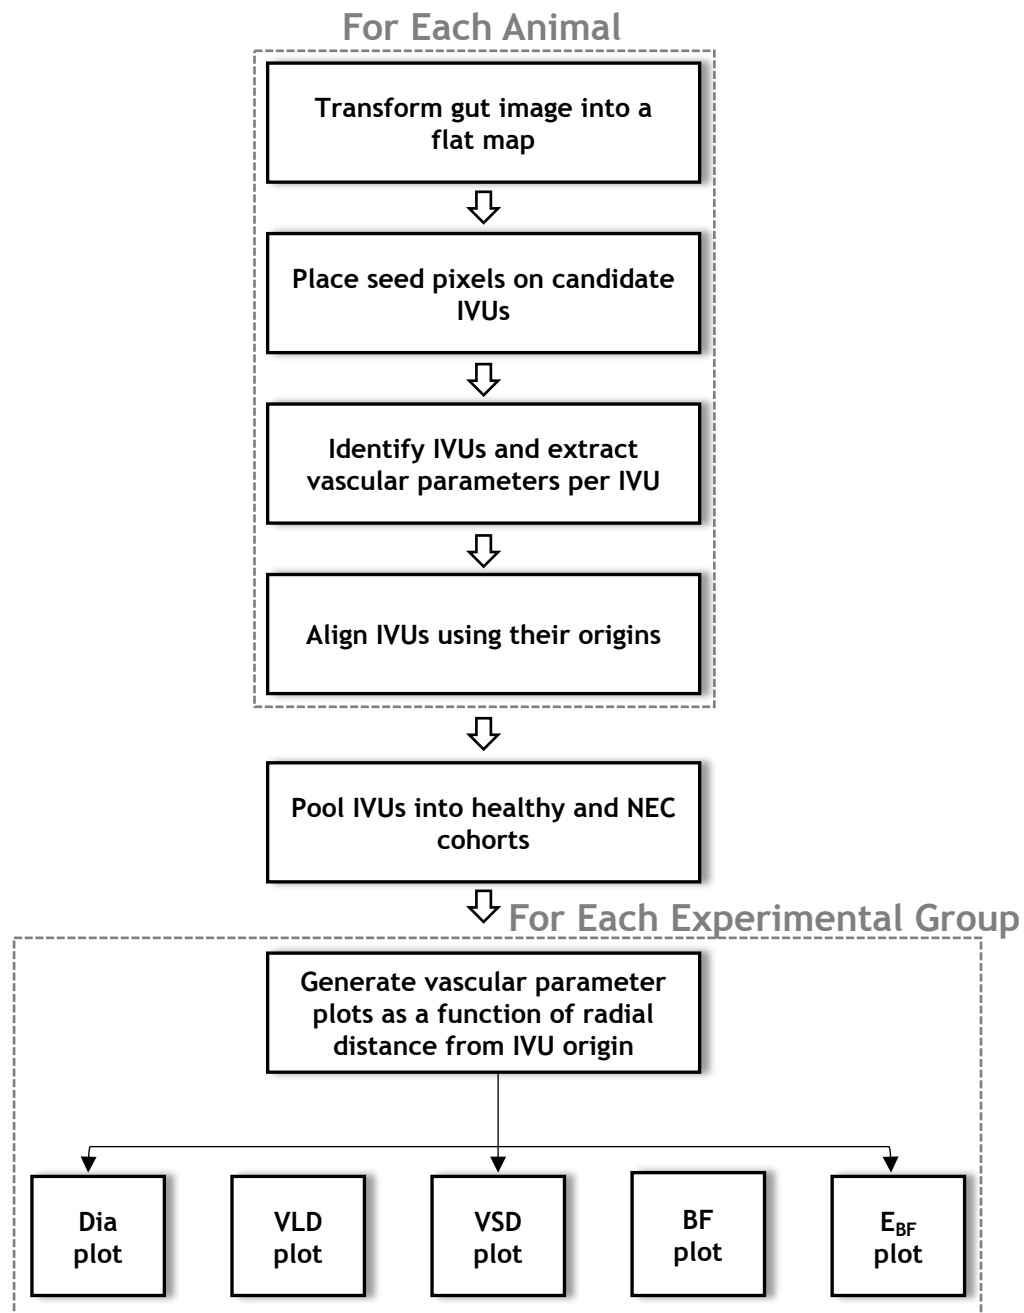

Supplementary Fig. 1

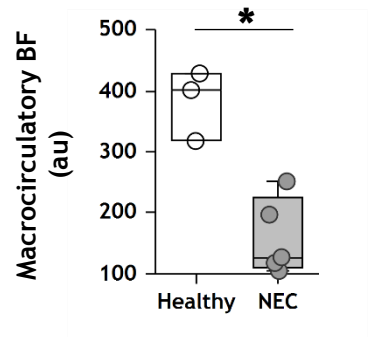

|                           | 0-300 $\mu\text{m}$ |                   |          | 300-600 $\mu\text{m}$ |                   |          | 600-900 $\mu\text{m}$ |                   |          | 900-1200 $\mu\text{m}$ |                   |          | 1200-1500 $\mu\text{m}$ |                   |          | 1500-1800 $\mu\text{m}$ |                   |          |
|---------------------------|---------------------|-------------------|----------|-----------------------|-------------------|----------|-----------------------|-------------------|----------|------------------------|-------------------|----------|-------------------------|-------------------|----------|-------------------------|-------------------|----------|
|                           | H                   | NEC               | $\Delta$ | H                     | NEC               | $\Delta$ | H                     | NEC               | $\Delta$ | H                      | NEC               | $\Delta$ | H                       | NEC               | $\Delta$ | H                       | NEC               | $\Delta$ |
| Dia ( $\mu\text{m}$ )     | 34.6 $\pm$ 6.0      | 30.4 $\pm$ 3.7    | -12%     | 28.9 $\pm$ 3.7        | 26.4 $\pm$ 2.3    | -9%      | 27.0 $\pm$ 3.0        | 24.5 $\pm$ 2.3    | -9%      | 25.2 $\pm$ 2.8         | 23.8 $\pm$ 2.7    | -6%      | 24.8 $\pm$ 3.9          | 24.6 $\pm$ 4.0    | -1%      | 24.2 $\pm$ 3.6          | 25.1 $\pm$ 3.6    | 4%       |
| VLD (mm/mm <sup>2</sup> ) | 14.7 $\pm$ 3.0      | 16.1 $\pm$ 3.2    | 10%      | 16.5 $\pm$ 3.0        | 17.8 $\pm$ 3.5    | 8%       | 18.0 $\pm$ 3.8        | 20.7 $\pm$ 4.4    | 15%      | 19.8 $\pm$ 5.7         | 23.8 $\pm$ 4.4    | 20%      | 21.7 $\pm$ 6.3          | 23.4 $\pm$ 6.9    | 8%       | 20.4 $\pm$ 7.7          | 25.3 $\pm$ 4.3    | 24%      |
| VSD (/mm <sup>2</sup> )   | 398.9 $\pm$ 123.8   | 455.4 $\pm$ 128.4 | 14%      | 482.0 $\pm$ 98.7      | 536.8 $\pm$ 132.2 | 11%      | 548.6 $\pm$ 158.3     | 659.9 $\pm$ 186.0 | 20%      | 653.7 $\pm$ 230.2      | 767.7 $\pm$ 180.7 | 17%      | 710.2 $\pm$ 248.8       | 768.0 $\pm$ 265.9 | 8%       | 673.8 $\pm$ 360.1       | 834.6 $\pm$ 176.9 | 24%      |
| BF (au)                   | 107.8 $\pm$ 42.0    | 30.7 $\pm$ 16.8   | 72%      | 80.0 $\pm$ 33.7       | 23.7 $\pm$ 10.7   | -70%     | 67.5 $\pm$ 26.3       | 19.6 $\pm$ 7.6    | -71%     | 62.2 $\pm$ 25.8        | 18.6 $\pm$ 7.6    | -70%     | 60.2 $\pm$ 28.2         | 20.7 $\pm$ 10.6   | -66%     | 56.2 $\pm$ 21.9         | 20.1 $\pm$ 6.9    | -64%     |
| EBF (au)                  | 2.1 $\pm$ 0.3       | 1.7 $\pm$ 0.4     | -19%     | 1.7 $\pm$ 0.3         | 1.4 $\pm$ 0.4     | -18%     | 1.5 $\pm$ 0.3         | 1.2 $\pm$ 0.4     | -20%     | 1.3 $\pm$ 0.3          | 1.0 $\pm$ 0.4     | -23%     | 1.2 $\pm$ 0.3           | 0.9 $\pm$ 0.4     | -25%     | 1.3 $\pm$ 0.3           | 1 $\pm$ 0.3       | -23%     |
